# Supplementary material for: ORAI1 and ORAI3 in Breast Cancer Molecular Subtypes and the Identification of ORAI3 as a Hypoxia Sensitive Gene and a Regulator of Hypoxia Responses
Source: Cancers (Basel). 2019 Feb 11;11(2):208. doi: 10.3390/cancers11020208 (PMC6406924; doi:10.3390/cancers11020208)

# Supplementary Material: ORAI1 and ORAI3 in Breast Cancer Molecular Subtypes and the Identification of ORAI3 as a Hypoxia Sensitive Gene and a Regulator of Hypoxia Responses

Iman Azimi, Michael J.G. Milevskiy, Silke B. Chalmers, Kunsala T.D.S Yapa, Mélanie Robitaille, Christopher Henry, Gregory J. Baillie, Erik W. Thompson, Sarah J. Roberts-Thomson and Gregory R. Monteith

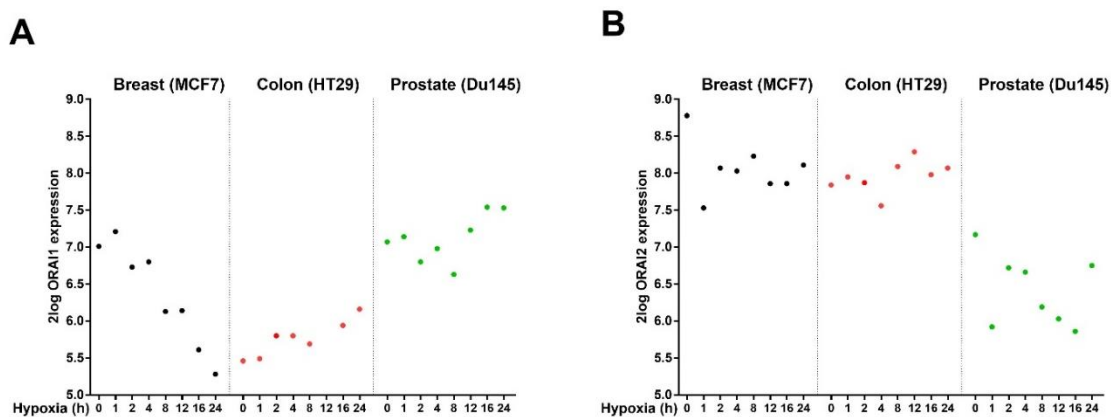

**Figure S1.** Assessment of *ORAI1* and *ORAI2* expression in breast (MCF7), colon (HT29) and prostate (Du145) cancer cells after exposure to normoxia (time-point 0 h) or different times of severe hypoxia (0% O<sub>2</sub> for 1, 2, 4, 8, 12, 16 and 24 h, respectively), extracted from publicly available data (Starmans et al., 2012) using the R2 genomics analysis platform (<http://r2.amc.nl>).

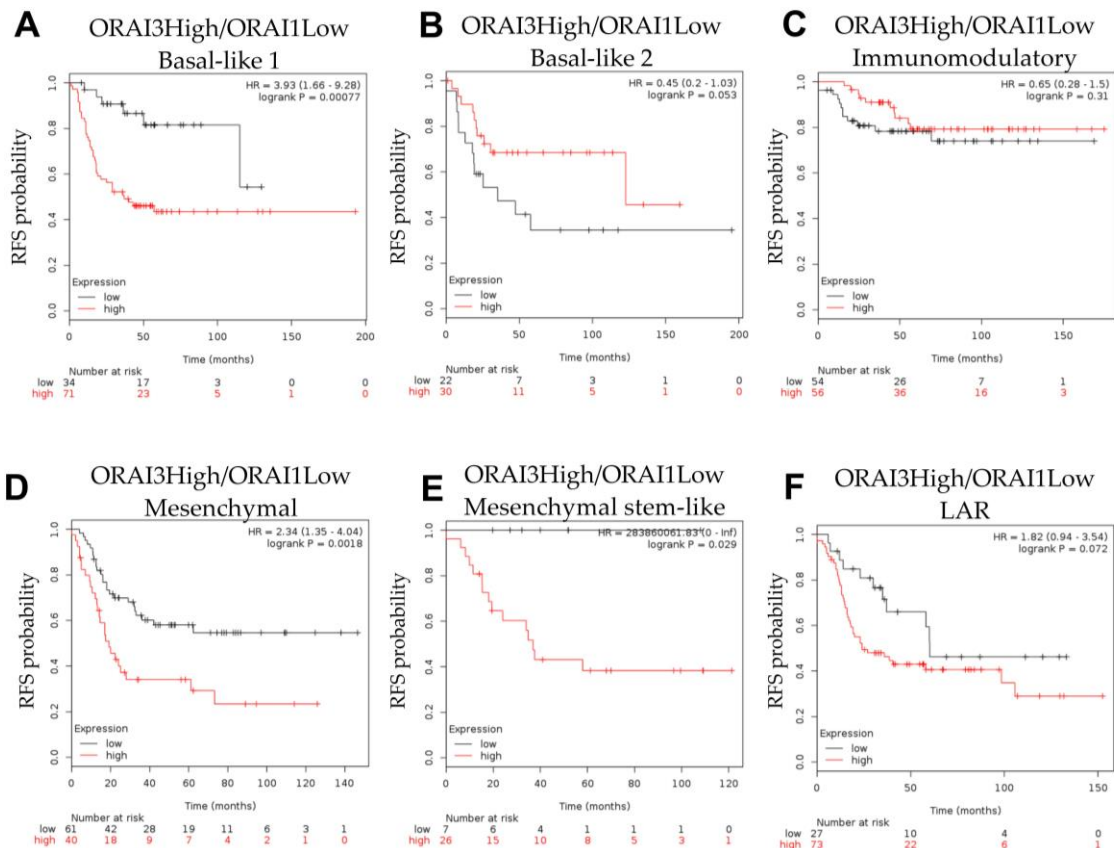

**Figure S2.** The combination of *ORAI3* and *ORAI1* expression stratifies survival of patients' relapse free survival (RFS) within the triple negative breast cancers. (A–F) Stratification of patient relapse-free survival based on *ORAI3* and *ORAI1* gene expression. *ORAI1* expression was inverted so that the 'high' expression group (red) is high expression of *ORAI3* and low expression of *ORAI1* and the 'low' expression group (black) is low expression of *ORAI3* and high expression of *ORAI1*.

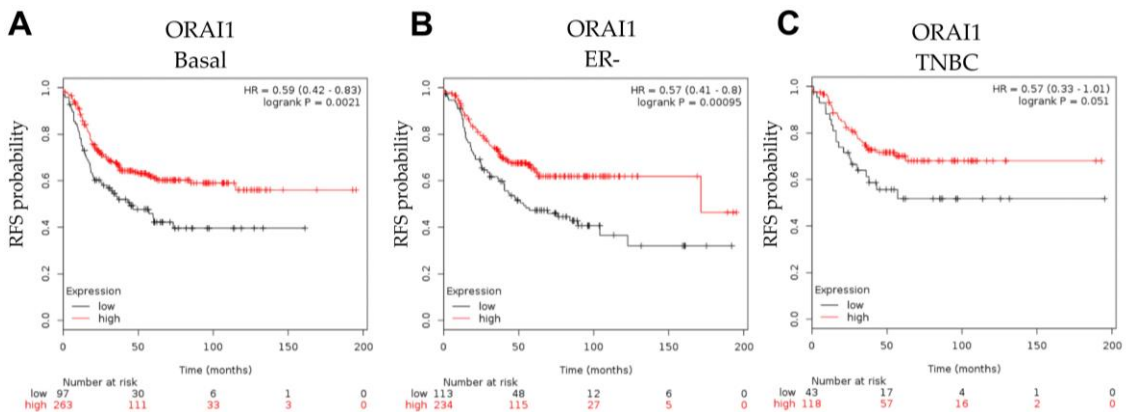

**Figure S3.** Stratification of patient relapse free survival (RFS) based on *ORAI1* expression in basal, estrogen-receptor negative (ER-) and triple negative breast cancer (TNBC) from the KM Plotter cohorts.

**Table S1.** Biological functions that were significantly predicted to be altered by ORAI3 silencing.

| Function Annotation                         | <i>p</i> -Value       | Predicted Activation | Activation z-Score | # Molecules |
|---------------------------------------------|-----------------------|----------------------|--------------------|-------------|
| Migration of cells                          | $1.20 \times 10^{-8}$ | Decreased            | −3.219             | 132         |
| Hypersensitive reaction                     | $9.96 \times 10^{-5}$ | Decreased            | −3.037             | 33          |
| Cell movement                               | $1.20 \times 10^{-7}$ | Decreased            | −3.022             | 141         |
| Activation of cells                         | $1.41 \times 10^{-5}$ | Decreased            | −2.946             | 67          |
| Inflammatory response                       | $3.68 \times 10^{-7}$ | Decreased            | −2.736             | 62          |
| Leukocyte migration                         | $1.99 \times 10^{-7}$ | Decreased            | −2.636             | 69          |
| Immune response of antigen presenting cells | $9.31 \times 10^{-7}$ | Decreased            | −2.553             | 22          |
| Response to macrophages                     | $1.51 \times 10^{-6}$ | Decreased            | −2.505             | 20          |
| Activation of myeloid cells                 | $3.74 \times 10^{-6}$ | Decreased            | −2.349             | 31          |
| Immune response of macrophages              | $2.05 \times 10^{-6}$ | Decreased            | −2.345             | 19          |
| Cell movement of leukocytes                 | $1.88 \times 10^{-6}$ | Decreased            | −2.338             | 60          |
| Response of antigen presenting cells        | $2.54 \times 10^{-7}$ | Decreased            | −2.322             | 24          |
| Infiltration by macrophages                 | $7.74 \times 10^{-6}$ | Decreased            | −2.314             | 19          |
| Activation of blood cells                   | $6.73 \times 10^{-5}$ | Decreased            | −2.308             | 51          |
| Engulfment by macrophages                   | $1.65 \times 10^{-6}$ | Decreased            | −2.292             | 17          |
| Activation of leukocytes                    | $2.12 \times 10^{-5}$ | Decreased            | −2.247             | 50          |
| Cellular infiltration by macrophages        | $1.33 \times 10^{-5}$ | Decreased            | −2.154             | 18          |
| Overweight disorder                         | $1.52 \times 10^{-5}$ | Decreased            | −2.136             | 41          |
| Obesity                                     | $3.06 \times 10^{-5}$ | Decreased            | −2.136             | 40          |
| Phagocytosis by macrophages                 | $4.76 \times 10^{-6}$ | Decreased            | −2.120             | 16          |
| Phagocytosis                                | $5.66 \times 10^{-6}$ | Decreased            | −2.046             | 29          |

**Table S2.** Univariate and multivariate analysis of Basal tumours from the METABRIC cohort.

| Condition                        | Univariate Cox-Proportional Hazards Model |             |                 | Multivariate Cox-Proportional Hazards Model (Stepwise) |             |                 |
|----------------------------------|-------------------------------------------|-------------|-----------------|--------------------------------------------------------|-------------|-----------------|
|                                  | HR                                        | (95% CI)    | <i>p</i> -Value | HR                                                     | (95% CI)    | <i>p</i> -Value |
| Age (<40 vs. 41–60 and >60)      | 2.424                                     | 1.333–4.408 | 0.0385          | 3.013                                                  | 1.607–5.65  | 0.0006          |
| Tumour Stage (0 to 4)            | 2.153                                     | 1.302–3.559 | 0.0029          | 2.298                                                  | 1.382–3.823 | 0.0014          |
| Orai3 (high vs low)              | 1.972                                     | 1.07–3.636  | 0.0305          | 1.866                                                  | 1.007–3.46  | 0.0485          |
| Lymph Node (+ vs. -)             | 2.099                                     | 1.179–3.738 | 0.0122          | ns                                                     |             | ns              |
| Orai2 (high vs. low)             | ns                                        |             | ns              | 3.929                                                  | 1.198–12.94 | 0.0251          |
| Menopausal Status (Post vs. Pre) | ns                                        |             | ns              | ns                                                     |             | ns              |
| MKI67 (high vs. low)             | ns                                        |             | ns              | ns                                                     |             | ns              |
| Orai1 (high vs. low)             | ns                                        |             | ns              | ns                                                     |             | ns              |
| Size (T1, T2, T3)                | ns                                        |             | ns              | ns                                                     |             | ns              |
| Tumour Grade (1,2,3)             | ns                                        |             | ns              | ns                                                     |             | ns              |

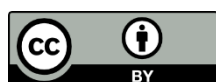

Supplement: Supplementary file 1 [file cancers-11-00208-s001.pdf]
